# Supplementary material
Source: PubMed Central journal article supplement (PMC4397932)
Supplement: NIHMS367456-supplement-01.pdf [file NIHMS367456-supplement-01.pdf]

## Online Data supplement

### **Estradiol Promotes Sudden Cardiac Death in Transgenic Long-QT Type 2 Rabbits while Progesterone is Protective**

#### **Methods**

All animal experiments were performed in accordance with the Institute for Laboratory Animal Research Guidelines after approval by the Institutional Animal Care and Use Committee.

#### **Ovariectomy, hormone pellet and telemetric ECG device implantation**

Ovariectomy and sham surgeries were performed in prepubertal LQT2 rabbits that were anesthetized with ketamine, xylazine, and buprenorphine (25 mg/kg; 3.75 mg/kg; 0.03 mg/kg IM), intubated and ventilated with isoflurane (0.5-2% in 0.5 O<sub>2</sub>). 90-day release pellets (Innovative Research of America) containing 17 $\beta$ -estradiol (150 mg), dihydrotestosterone (200 mg), progesterone (150 mg), or placebo were implanted subcutaneously. Telemetric ECG devices (F70-EEE, Data Sciences International) were implanted subcutaneously on the rabbits' back, and pairs of electrodes were tunnelled to the right shoulder, left lateral thorax, and both hips as described<sup>8</sup>.

Blood samples were obtained at baseline, after 30 and 60 days of hormone-treatment. Serum hormones were extracted using diethyl-ether, and the levels were quantified using ELISA kits (11-DHTHU-E01, 11-PROHU-E01, 20-DR-4399, ALPCO Diagnostics). As described previously<sup>12, 13</sup>, treatment with 90-day release pellets resulted in significantly (10-15 times) higher hormone levels than in sham-operated or ovariectomized females (Fig. 1 supplement), reaching estradiol levels similar to women during the follicular phase, progesterone levels comparable to pregnant rabbits (Lau et al., 1984), and dihydrotestosterone levels similar to sham-operated males. Transthoracic echocardiography was performed after 8 weeks hormone-treatment (parasternal long axis, 7.5 MHz probe) to exclude pro-hypertrophic hormone effects (Table 1 supplement).

### **Telemetric ECG monitoring: QT/RR ratio and arrhythmia screening**

Analog telemetric ECG signals were acquired by Dataquest ART data acquisition software (DSI) and were analyzed using Ponemah ECG analysis software (DSI)<sup>8, 9</sup>. Pairs of QT/RR intervals were averaged over 5 s every 20 min during a 24-hour monitoring period. QT/RR ratio was calculated using linear regressions and QT/RR ratio at baseline and after 4 weeks of hormone-treatment were compared. To evaluate sex hormone effects on QT duration irrespective of the heart rate, we applied the following previously established heart rate correction formula<sup>8</sup>: LQT2: QT expected = 35 + 0.50 \* RR. The QT-index (QT<sub>i</sub>) was defined as the percentage of the observed vs. the expected QT

Rabbits were screened for arrhythmias (atrio-ventricular (AV) blocks, premature ventricular contractions (PVCs), bigeminy, couplets, triplets, non-sustained ventricular tachycardia (VT) < 30 s duration, and sustained VT > 30 s duration) within corresponding 2-hour intervals one week prior to electrophysiological studies (EPS) and within 96 hours post EPS and arrhythmias were classified using Lown's classification<sup>14</sup>. In rabbits that survived, arrhythmias were analyzed in two 2-hour intervals – 2-4 hours and 10-12 hours after EPS – which were defined by the different time points of death in four rabbits. In rabbits that died within the 96 hours period, arrhythmias were analyzed at the 2-4 hours interval as well as during the 2 hours prior to death. Similarly as in clinical LQTS studies<sup>3</sup>, we assessed the incidence of the compound endpoint major life-threatening cardiac events – defined as pVT and SCD – during the 8 weeks of hormone-treatment.

### ***In vivo* electrophysiological studies (EPS)**

After 8 weeks of hormone-treatment, catheter-based *in vivo* EPS were performed<sup>15</sup> in *n*=6 rabbits per group. Under isoflurane anesthesia (0.5-2% in 0.5 O<sub>2</sub>) steerable quadripolar and decapolar 4F EP-catheters (Irvine Biomedical) were placed in the right atrium and right ventricle via the right femoral and jugular veins. ECG signals were recorded continuously using the EP-Bard-System Software OS2/warp (kindly provided by Bard Electrophysiology),

filtered with a bandwidth of 30–250 Hz (intracardiac signals) or 0.01–100 Hz (surface ECG). EPS were performed at a stimulation cycle length (CL) of 300 and 240 ms at twice the threshold. Ventricular effective refractory periods (VERP) in RVapex and septal-base position were assessed by progressively shortening the S2-interval in 10-ms steps after 8-beat S1 trains. VERP-dispersion, defined as difference between VERP<sub>base</sub> and apex, was calculated. Complete EPS were performed at baseline and during isoproterenol infusion (0.10 - 0.25 µg/min to increase the spontaneous heart rate to 120%).

### **Optical mapping**

Heart preparation and retrograde perfusion were performed as described<sup>8</sup> in  $n=4-7$  rabbits per group one week after EPS. Blebbistatin (5 µM) was added to the perfusate to reduce motion artefacts (Fedorov et al., 2007). We used a dual voltage-calcium camera system (100x100 pixels, Ultima-L, Scimedica, Japan)<sup>16</sup> and fluorescence probes PGH1 for membrane potential ( $V_m$ ) (generously provided by Dr. Guy Salama, University of Pittsburgh) and rhod-2 for  $Ca_i$  (Invitrogen). Images were acquired from the anterior surface of the LV and the field of view was set to  $1.5 \times 1.5 \text{ cm}^2$  with a spatial resolution of  $150 \times 150 \text{ µm}^2$ . Hearts were stimulated with progressively faster pacing until either loss of 1:1 capture or VF induction occurred. Sampling rate was set to 1000 f/s, and data were analyzed with custom-built software using Interactive Data Language (ITT Visual Information Solutions) as described in detail<sup>8, 16</sup>. Action potential duration (APD) maps were calculated by averaging 5 consecutive beats at 350 ms stimulation CL. To investigate hormone effects on early afterdepolarisation (EAD) formation, hearts were exposed to an intra-coronary isoproterenol bolus (140 nM) after performing AV-node ablation with an electrocautery to slow the heart rate (similar to observed AV block prior to *in vivo* pVT).

### **Patch clamp**

Isolation of cardiomyocytes by standard enzymatic techniques and patch-clamp recordings were performed as described<sup>8</sup>. Apical ventricular myocytes were isolated from

hearts of  $n=3$  rabbits per group. Whole-cell recordings (11-18 cardiomyocytes per group) were obtained with an Axopatch-200B amplifier (Axon Instruments) with standard patch-clamp techniques.  $I_{to}$ ,  $I_{K1}$  and  $I_{Ca,L}$  were recorded in standard Tyrode solution, while  $I_{Kr}$  and  $I_{Ks}$  were recorded in low  $K^+$  and low divalent cation solution as described<sup>8</sup>. For  $I_{Kr}$  and  $I_{Ks}$  recording, holding potential was at  $-40$  mV, test potentials were from  $-30$  to  $+30$  mV with steps of  $10$  mV lasting  $3$  seconds. Tail current was recorded after the test potential was back to  $-40$  mV. For  $I_{to}$  recording, holding potential was at  $-80$  mV and test potentials were from  $-20$  to  $+50$  mV with steps of  $10$  mV lasting  $400$  ms. For  $I_{K1}$  recording, a  $2$ -second ramp from  $-120$  mV to  $+60$  mV was used as stimulation voltage. For  $I_{Ca,L}$  recording, holding potential was  $-50$  mV, test potentials were  $-40$  to  $+40$  mV with  $10$  mV steps lasting  $250$  ms.  $I_{Ca,L}$  was defined as the difference of peak and steady state current at the end of pulse. E-4031 ( $5$   $\mu$ M) and chromanol 293B ( $30$   $\mu$ M) were used for isolating  $I_{Kr}$  and  $I_{Ks}$ , respectively. Tetrodotoxin ( $20$   $\mu$ M) and  $CdCl_2$  ( $0.2$  mM) were added to block  $Na^+$  and  $Ca^{2+}$  currents.

### Western Blot

After 2 months of hormone-treatment, hearts were removed, sectioned, and rapidly frozen in liquid nitrogen. Crude membrane preparations of the LV apex were obtained as described<sup>8</sup>. Membrane protein samples were mixed with 4x Laemli-SDS, heated for  $5$  min at  $95^\circ C$ , then loaded onto an  $8\%$  acrylamide/SDS gel and run at  $55$  mA for at least  $3$  h. Proteins were transferred onto a nitrocellulose membrane (Perkin Elmer) overnight at  $54$  V at  $4^\circ C$  and membranes were blocked with  $5\%$  milk/TBS. Anti-SERCA2a (Thermo Scientific, MA3-919), anti-PLN (Thermo Scientific, MA3-922), and anti-NCX (Thermo Scientific, MA3-926) mouse monoclonal were used as primary antibodies and HRP conjugated goat-anti-mouse (IgG polyclonal, Thermo Scientific) as secondary antibodies. GAPDH was used as loading control (Sigma, 68795). For quantification, Image-J was used with the GAPDH signal utilized to correct for loading errors by calculating the ratio of target protein intensity to GAPDH intensity.

## Statistical analysis

For normally distributed values, we used Student's *t*-test (paired and unpaired). Chi-square test was used for categorical variables. Analysis was performed with Prism 4.03 for Windows (Graphpad). All data are presented as means  $\pm$  SD if not mentioned otherwise, and a *p* value  $\leq 0.05$  was considered significant.

## Figure 1 supplement

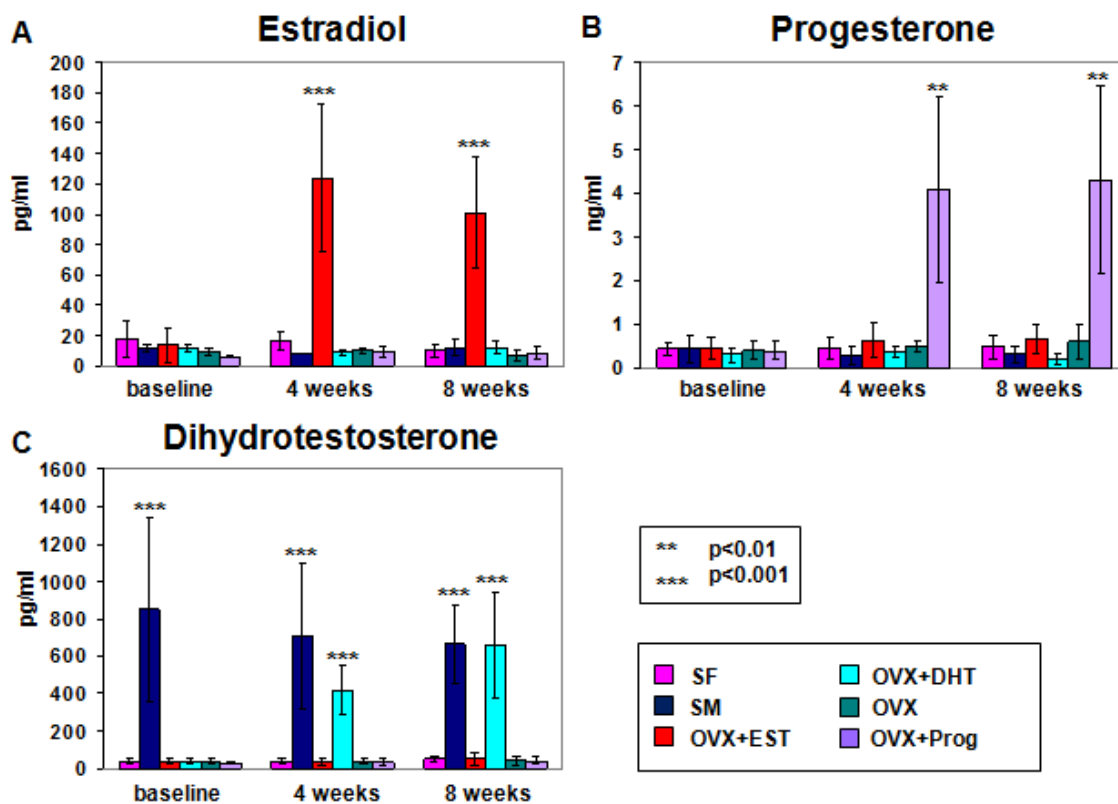

## Figure 1 Supplement

### Hormone Serum Levels

**A.–C.** Serum estradiol (A, EST, pg/ml), progesterone (B, PROG, ng/ml), and dihydrotestosterone (C, DHT, pg/ml) levels in sham-operated females (SF), and males (SM), EST, DHT, OVX, and PROG-treated females (*n*=12) at baseline (before ovariectomy surgery), and after 4 and 8 weeks of hormone treatment. \*\* *p*<0.01; \*\*\* *p*<0.001. All values are shown as mean  $\pm$  SD.

## Table 1 Supplement

### Echocardiographic parameters

|             | IVSd (mm) | LVPWd (mm) | LVIDd (mm) |
|-------------|-----------|------------|------------|
| <b>SF</b>   | 2.73±0.01 | 2.66±0.11  | 10.5±1.05  |
| <b>SM</b>   | 2.87±0.03 | 2.95±0.12  | 10.3±1.15  |
| <b>EST</b>  | 2.67±0.27 | 2.73±0.23  | 11.7±0.42  |
| <b>DHT</b>  | 2.84±0.07 | 2.80±0.23  | 11.7±0.14  |
| <b>OVX</b>  | 2.62±0.14 | 2.80±0.28  | 9.97±0.73  |
| <b>PROG</b> | 2.79±0.26 | 2.87±0.09  | 9.82±0.1   |

**Table 1 Supplement:** Echocardiographic parameters (IVSd, diastolic wall thickness of interventricular septum; LVPWd, diastolic wall thickness of LV posterior wall; LVIDd, diastolic internal LV diameter) in ( $n=3$ ) hormone-treated ovariectomized female (EST, DHT, PROG, and OVX), sham-operated female (SF), and male (SM) LQT2 rabbits.

### Additional references

Lau IF, Saksena SK, Salmons R: The concentrations of progesterone, 20 alpha-dihydroprogesterone, testosterone, oestrone and oestradiol-17 beta in serum, amniotic fluid and placental tissue of pregnant rabbits. *Acta Endocrinol* 1982; 99:605-611.

Fedorov VV, Lozinsky IT, Sosunov EA, et al.: Application of blebbistatin as an excitation-contraction uncoupler for electrophysiologic study of rat and rabbit hearts. *Heart Rhythm* 2007; 4:619-626.
